# Supplementary material for: Effect of Acupuncture vs Sham Acupuncture on Patients With Poststroke Motor Aphasia: A Randomized Clinical Trial
Source: PubMed Central journal article supplement (PMC10804271; doi:10.1001/jamanetworkopen.2023.52580), 2024-01-22
Supplement: jamanetwopen-e2352580-s002.pdf [file jamanetwopen-e2352580-s002.pdf]

## Supplemental Online Content

Li B, Deng S, Zhou B, et al. Effect of acupuncture vs sham acupuncture on patients with poststroke motor aphasia: a randomized clinical trial. *JAMA Netw Open*. 2024;7(1):e2352580. doi:10.1001/jamanetworkopen.2023.52580

**eTable 1.** Inclusion Criteria, Exclusion Criteria, and Dropout Criteria

**eTable 2.** Acupuncture Operation Details

**eTable 3.** Acupuncture Intervention Details

**eTable 4.** Results: Between-Group Comparison of Compliance of Participants

**eTable 5.** Results: Treatment-by-Visit Interaction Test for the Primary Outcome<sup>a</sup>

**eTable 6.** Results: Adverse Event Analysis

**eTable 7.** Results: Adverse Event Descriptions

**eFigure 1.** Acupoint and Sham Acupoint Locations

**eFigure 2.** Schedule of Enrollment, Interventions, and Assessments

**eFigure 3.** Results: Subgroup Analysis

This supplemental material has been provided by the authors to give readers additional information about their work.

**eTable 1.** Inclusion Criteria, Exclusion Criteria, and Dropout Criteria

|                    |                                                                                                                                                                                                                                                                                                                                                                                                                                                                                                                                                                                                                    |
|--------------------|--------------------------------------------------------------------------------------------------------------------------------------------------------------------------------------------------------------------------------------------------------------------------------------------------------------------------------------------------------------------------------------------------------------------------------------------------------------------------------------------------------------------------------------------------------------------------------------------------------------------|
| Inclusion criteria | (I) Patients diagnosed with ischemic stroke according to the International Classification of Diseases code ICD-10-I63.902.<br>(II) Patients diagnosed with aphasia for the first time after stroke.<br>(III) Patients diagnosed with aphasia ranging from 15 to 90 days after onset.<br>(IV) An aphasia severity of 0–3 that can cooperate with speech training.<br>(V) Consciousness and stable vital signs.<br>(VI) Patients aged 45-75 years and either male or female.<br>(VII) Patients and their families understand the research content fully, agree to participate, and signed the informed consent form. |
| Exclusion criteria | (I) Patients diagnosed with aphasia not caused by stroke.<br>(II) Patients with aphasia occurring before stroke onset.<br>(III) Patients with severe heart disease and kidney and liver function insufficiency.<br>(IV) Patients with audiovisual dysfunction, severe cognitive impairment, or mental illness who cannot cooperate with examination and treatment.<br>(V) Pregnant or lactating women.                                                                                                                                                                                                             |
| Dropout criteria   | (I) Patients with poor compliance during the clinical study who are unwilling to accept the intervention or who withdraw voluntarily.<br>(II) Patients who experience severe adverse reactions or deterioration during the clinical study and are not eligible for further intervention.                                                                                                                                                                                                                                                                                                                           |

**eTable 2.** Acupuncture Operation Details

|                          | Acupoint        | Acupoint location                                                                                                                                                                                                | Needle method                 | Acupuncture manipulation                                                                                                                             | De Qi response                             |
|--------------------------|-----------------|------------------------------------------------------------------------------------------------------------------------------------------------------------------------------------------------------------------|-------------------------------|------------------------------------------------------------------------------------------------------------------------------------------------------|--------------------------------------------|
| Manual acupuncture group | Shuigou (GV26)  | On the face, at the intersection of the upper one-third and middle one-third of the philtrum midline                                                                                                             | Insert at a depth of 5–10 mm  | Pecking technique to achieve an intense 6-9-s stimulation                                                                                            | Deep ache and throbbing.                   |
|                          | Neiguan (PC6)   | In the volar aspect of the forearm, at the junction of Quze (PC3) and Daling (PC7), 2 cun above the wrist crease in the space between tendon palmaris longus and vagina tendinis musculi flexoris carpi radialis | Insert at a depth of 5–10 mm  | Counterclockwise at the left side and clockwise at the right side with twisting force, together with light insertion and heavy lifting, for 1 minute | Numbness sensation spreading on forearm    |
|                          | Weizhong (BL40) | At the midpoint of the popliteal crease, at the midpoint between the femoral biceps tendon and the semitendinosus tendon                                                                                         | Insert at a depth of 25–35 mm | Light insertion and heavy lifting manipulation                                                                                                       | Make the affected leg twitch three times   |
|                          | Lianquan (CV23) | In the anterior region of the neck, superior to the superior border of the thyroid cartilage, in the depression superior to the hyoid bone on the anterior median line                                           | Insert at a depth of 55 mm    | Light insertion and heavy lifting manipulation                                                                                                       | Numbness sensation spreading to the tongue |

|                        |                           |                                                                                                                                       |                                                                    |                                                |                                                              |
|------------------------|---------------------------|---------------------------------------------------------------------------------------------------------------------------------------|--------------------------------------------------------------------|------------------------------------------------|--------------------------------------------------------------|
|                        | Panglianquan(beside CV23) | At 0.5 cun apart from both sides of CV23                                                                                              | Insert at a depth of 25–35 mm                                      | Light insertion and heavy lifting manipulation | Numbness sensation spreading to the tongue                   |
|                        | Jiquan (HT1)              | In the axilla, in the center of the axillary fossa, over the axillary artery                                                          | Insert at a depth of 25–35 mm                                      | Light insertion and heavy lifting manipulation | Make the affected arm twitch three times.                    |
|                        | Chize (LU5)               | In the cubital crease, at the depression of the bicipital muscle tendon radialis at the elbow                                         | Insert at a depth of 25–35 mm                                      | Light insertion and heavy lifting manipulation | Make the affected hand rotate outward and twitch three times |
|                        | Sanyinjiao (SP6)          | In crus inside, 3 cun above the upper border of the medial malleolus of the ankle at the posterior border of the tibia                | Insert at a depth of 25–35 mm                                      | Heavy insertion and light lifting manipulation | Make the affected leg twitch three times                     |
| Sham acupuncture group | Sham PC6                  | In the volar aspect of the forearm, 2 cun above the wrist crease, between the flexor carpi radialis tendon and brachioradialis tendon | Insert needle in 0.2 cun                                           | Without needle manipulation                    | Deep ache or dull ache, without spreading                    |
|                        | Sham GV26                 | On the face, by the sides of GV26 1cun, above the corner of the mouth                                                                 | Insert needle toward the nasal septum in 0.2 cun                   |                                                |                                                              |
|                        | Sham SP6                  | In crus inside, 3 cun above the tip of the medial malleolus, at the anterior border of the tibia, about 1.25 cun in front of SP6      | Insert needle along with the medial border of the tibia in 0.2 cun |                                                |                                                              |

|  |                  |                                                                                                                                         |                          |  |  |
|--|------------------|-----------------------------------------------------------------------------------------------------------------------------------------|--------------------------|--|--|
|  | Sham HT1         | Extend the upper arm, 1 cun below the apex of the armpit, about 1 cun forward, avoiding the armpit hair, over the abdomen of the biceps | Insert needle in 0.2 cun |  |  |
|  | Sham LU5         | Bend the elbow 120°, at the midpoint of the line between LU5 and LI11                                                                   | Insert needle in 0.2 cun |  |  |
|  | Sham BL40        | On the belly of peroneus longus, at the inferolateral of BL40. Inferior to BL40 1cun and lateral to 1cun                                | Insert needle in 0.2 cun |  |  |
|  | Sham CV23        | At the rear of CV23, and by the sides of the median line 1cun                                                                           | Insert needle in 0.2 cun |  |  |
|  | Sham beside CV23 | At the rear of beside CV23, and by the sides of the median line 2cun                                                                    | Insert needle in 0.2 cun |  |  |

<sup>a</sup>cun: 1 cun ( $\approx 25$  mm) is defined as the width of the interphalangeal joint of the patient's thumb.

**eTable 3.** Acupuncture Intervention Details

| Item                  | Manual acupuncture group                                                                                                                       | Sham acupuncture group |
|-----------------------|------------------------------------------------------------------------------------------------------------------------------------------------|------------------------|
| Intervention time     | 6 week                                                                                                                                         |                        |
| Observation time      | Within 6 months of onset time                                                                                                                  |                        |
| Needle retention time | 30min                                                                                                                                          |                        |
| Acupuncture frequency | 5 times/week                                                                                                                                   |                        |
| Acupuncturist         | Senior professional doctors with profound background knowledge and rich experience accumulated for many years                                  |                        |
| Materials             | Disposable sterile acupuncture needles (0.25 mm × 40 mm, 0.25 mm × 75 mm; Hwato brand; Suzhou Medical Supplies Factory Co. LTD, Suzhou, China) |                        |

**eTable 4.** Results: Between-Group Comparison of Compliance of Participants

| Compliance of participants             | Manual acupuncture (n=115) | Sham acupuncture (n=116) | 95% CI of Difference  | <i>P</i> <sup>a</sup> |
|----------------------------------------|----------------------------|--------------------------|-----------------------|-----------------------|
| Compliance > 80%, No. (%)              | 111 (96.5)                 | 114 (98.3)               | -                     | -                     |
| Completed treatment session, mean (SD) | 98.20 (9.80)               | 99.22 (6.08)             | -1.02 (-3.13 to 1.09) | 0.342                 |

<sup>a</sup>*P* value based on t test.



**eTable 5.** Results: Treatment-by-Visit Interaction Test for the Primary Outcome<sup>a</sup>

|                   | <i>F</i> | FAS<br><i>P</i> | $\eta^2$ |
|-------------------|----------|-----------------|----------|
| AQ                |          |                 |          |
| Group effect      | 5.49     | 0.020           | 0.023    |
| Visit effect      | 141.55   | <0.001          | 0.803    |
| Group*time effect | 13.18    | <0.001          | 0.226    |
| CFCP              |          |                 |          |
| Group effect      | 6.49     | 0.012           | 0.028    |
| Visit effect      | 107.34   | <0.001          | 0.705    |
| Group*time effect | 8.07     | <0.001          | 0.152    |

<sup>a</sup> crude model: adjusted for none.

**eTable 6.** Results: Adverse Event Analysis

| Adverse event                               | Manual acupuncture (n=115) | Sham acupuncture (n=116) | <i>P</i> <sup>a</sup> |
|---------------------------------------------|----------------------------|--------------------------|-----------------------|
| Participants with no adverse event, No. (%) | 112 (97.4)                 | 113 (97.4)               | 1.000                 |
| Participants with adverse event, No. (%)    | 3 (2.6)                    | 3 (2.6)                  |                       |

<sup>a</sup>P value based on Fisher exact test.

**eTable 7.** Results: Adverse Event Descriptions

| <b>Clinical Sites</b>                                                         | <b>Randomization number</b> | <b>Adverse event description</b> |
|-------------------------------------------------------------------------------|-----------------------------|----------------------------------|
| First Teaching Hospital of Tianjin University of Traditional Chinese Medicine | 1050                        | aural vertigo                    |
| Qilu Hospital of Shandong University                                          | 3003                        | pain after acupuncture           |
| Qilu Hospital of Shandong University                                          | 3004                        | subcutaneous hematoma at CV23    |
| Qilu Hospital of Shandong University                                          | 3005                        | pain after acupuncture           |
| Qilu Hospital of Shandong University                                          | 3030                        | pain after acupuncture           |
| Qilu Hospital of Shandong University                                          | 3031                        | subcutaneous hematoma at SP6     |

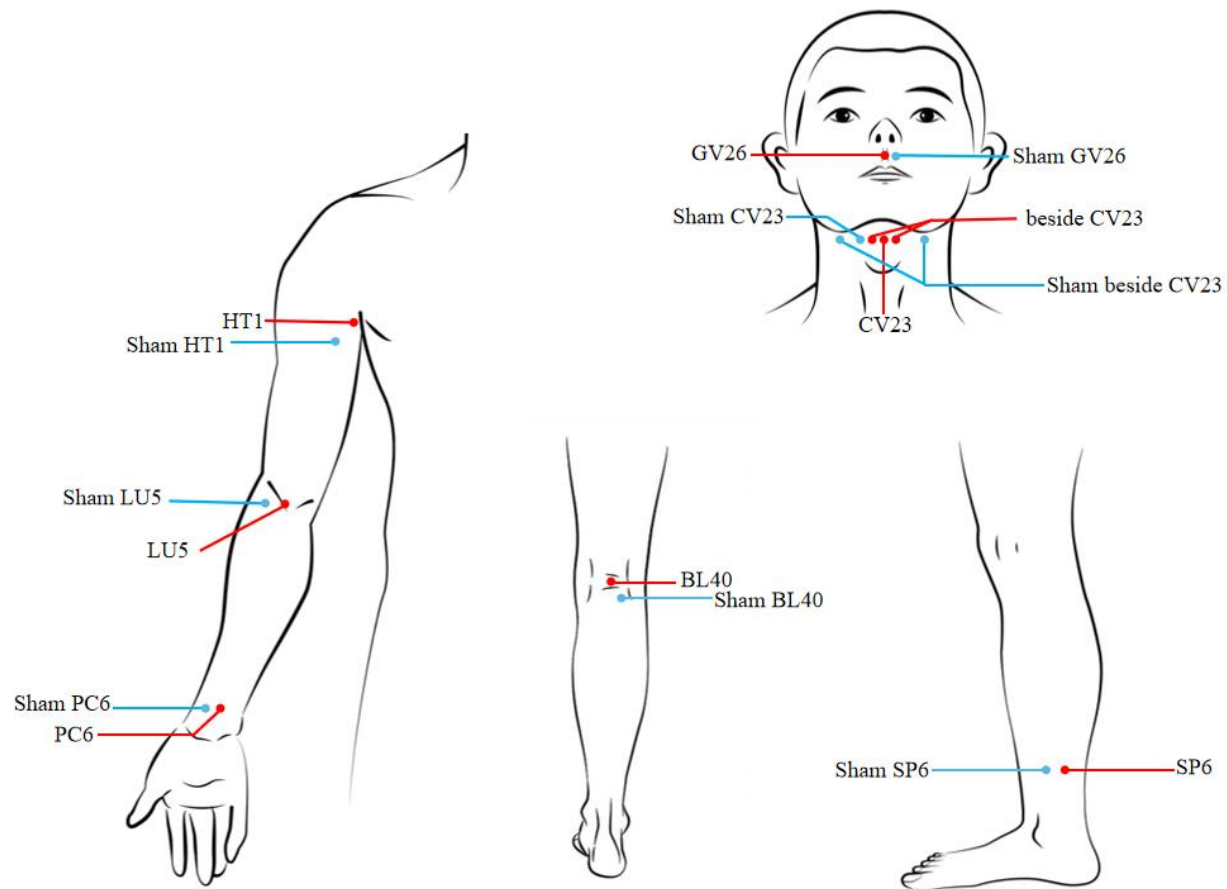

**eFigure 1.** Acupoint and Sham Acupoint Locations

| TIMEPOINT                                    | STUDY PERIOD |                                                                                    |          |          |           |                                      |
|----------------------------------------------|--------------|------------------------------------------------------------------------------------|----------|----------|-----------|--------------------------------------|
|                                              | Baseline     | Intervention phase                                                                 |          |          | Follow-up |                                      |
|                                              | $t_0$        | $t_{2w}$                                                                           | $t_{4w}$ | $t_{6w}$ | $t_{12w}$ | End of 6 months after the onset time |
| ENROLMENT:                                   |              |                                                                                    |          |          |           |                                      |
| Eligibility screen                           | X            |                                                                                    |          |          |           |                                      |
| Basic characteristic variables               | X            |                                                                                    |          |          |           |                                      |
| Informed consent                             | X            |                                                                                    |          |          |           |                                      |
| Allocation                                   | X            |                                                                                    |          |          |           |                                      |
| INTERVENTIONS:                               |              |  |          |          |           |                                      |
| Western Aphasia Battery                      | X            | X                                                                                  | X        | X        | X         | X                                    |
| Boston Diagnostic Aphasia Examination        | X            | X                                                                                  | X        | X        | X         | X                                    |
| Chinese Functional Communication Profile     | X            | X                                                                                  | X        | X        | X         | X                                    |
| National Institutes of Health Stroke Scale   | X            | X                                                                                  | X        | X        | X         | X                                    |
| Stroke and Aphasia Quality of Life Scale-39  | X            | X                                                                                  | X        | X        | X         | X                                    |
| Stroke-Specific Quality of Life Scale        | X            | X                                                                                  | X        | X        | X         | X                                    |
| Health Scale of Traditional Chinese Medicine | X            | X                                                                                  | X        | X        | X         | X                                    |
| Combined diseases and drugs                  |              | X                                                                                  | X        | X        | X         | X                                    |
| Adverse event                                |              | X                                                                                  | X        | X        |           |                                      |
| Compliance                                   |              | X                                                                                  | X        | X        |           |                                      |

**eFigure 2.** Schedule of Enrollment, Interventions, and Assessments

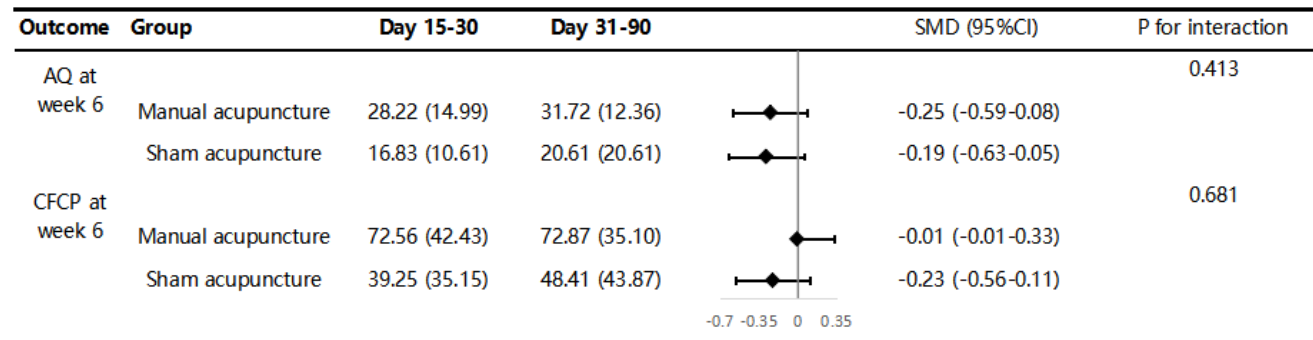

**eFigure 3.** Results: Subgroup Analysis. Abbreviations: AQ, aphasia quotient; CFCP, Chinese Functional Communication Profile; SMD: standardized mean difference.
