# Supplementary material for: Effect of Acupuncture vs Sham Acupuncture on Patients With Poststroke Motor Aphasia: A Randomized Clinical Trial
Source: PubMed Central journal article supplement (PMC10804271; doi:10.1001/jamanetworkopen.2023.52580), 2024-01-22
Supplement: jamanetwopen-e2352580-s003.pdf [file jamanetwopen-e2352580-s003.pdf]

## Data Sharing Statement

Li. Effect of Acupuncture vs Sham Acupuncture on Patients With Poststroke Motor Aphasia. *JAMA Netw Open*. Published January 22, 2024. doi:10.1001/jamanetworkopen.2023.52580

### Data

**Data available:** Yes

**Data types:** Deidentified participant data, Data dictionary

**How to access data:** It will be made available to others upon request to the corresponding authors ([profmengzhihong@163.com](mailto:profmengzhihong@163.com)), only for research, and non-commercial purposes to individuals affiliated with academic or public health institutions.

**When available:** With publication

### Supporting Documents

**Document types:** Statistical/analytic code, Informed consent form

**How to access documents:** It will be made available to others upon request to the corresponding authors ([profmengzhihong@163.com](mailto:profmengzhihong@163.com)), only for research, and non-commercial purposes to individuals affiliated with academic or public health institutions.

**When available:** With publication

### Additional Information

**Who can access the data:** researchers whose proposed use of the data has been approved

**Types of analyses:** only for research

**Mechanisms of data availability:** with investigator support
